# Supplementary material for: Exploitation of human mesenchymal stromal cell derived matrix towards the structural and functional restoration of the ocular surface
Source: Royal Society of Chemistry journal article supplement (doi:10.1039/d0bm00787k), 2020-01-01

**Supplemental Figure 1.** DMA was better than AM in promotion the proliferation of conjunctival epithelial cells in vitro. (A) Viable cells on the tissue culture plates (TCP), amniotic membranes (AM) treated culture plates, and DMA treated culture plates using a live/dead staining assay. Live cells were stained green and dead cells were red. Scar bar: 200um. (B) mRNA expression and immunostaining of Ki67 was conducted to evaluate proliferative state of CjECs on TCP, AM and DMA. Scar bar: 50um. (C) Western blot showed p-Akt and Akt protein levels of CjECs seeded on TCP, AM and DMA. (D) mRNA expression and immunofluorescence staining of P63 were conducted in three groups to examine the maintenance of undifferentiated state of CjECs on TCP, AM and DMA. Scar bar: 50um. \*P<0.05, \*\*P<0.01, \*\*\*P<0.001, one-way ANOVA.

**A**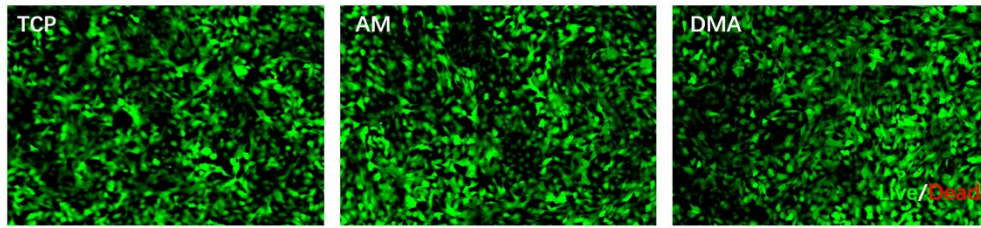**B**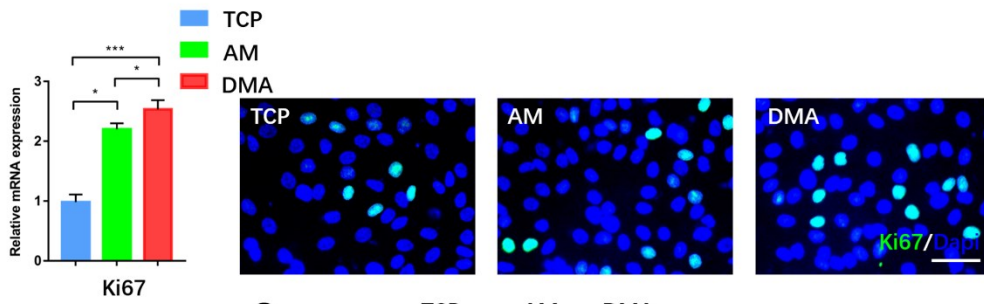**C**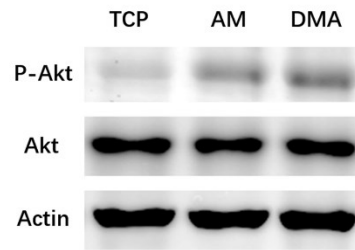**D**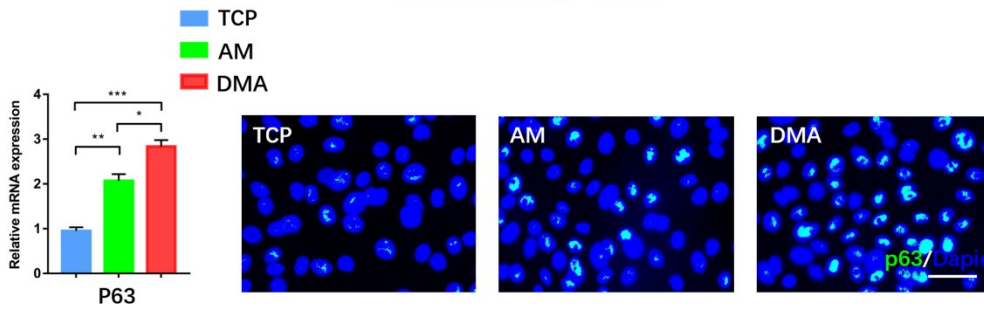

Supplement: d0bm00787k1.pdf [file d0bm00787k1.pdf]
